# Supplementary material for: Screening of Genes Specifically Expressed in Males ofFenneropenaeus chinensisand Their Potential as Sex Markers
Source: Hindawi journal article supplement (doi:10.1155/2013/921067), 2013-01-01
Supplement: f1 [file 921067.f1.xlsx]

## Sheet: Sheet1
Sequence ID	Swissport Top-hit Annotation	E value
Contig1	gnl|CDD|117221 pfam08648, DUF1777, Protein of unknown function	1e-12
Contig4	gnl|CDD|185508 PTZ00194, PTZ00194, 60S ribosomal protein L26	3e-10
Contig6	gnl|CDD|183029 PRK11192, PRK11192, ATP-dependent RNA helicase SrmB	5e-07
Contig10	/	/
Contig13	/	/
Contig16	/	/
Contig17	/	/
Contig18	/	/
Contig19	/	/
Contig20	/	/
Contig21	gnl|CDD|34868 COG5271, MDN1, AAA ATPase containing von Willebrand factor type A (vWA) domain	4e-10
Contig22	/	/
Contig24	/	/
Contig26	/	/
Contig27	/	/
Contig28	gnl|CDD|151191 pfam10695, Cw-hydrolase, Cell wall-associated hydrolase	3e-12
Contig29	gnl|CDD|144660 pfam01147, Crust_neurohorm, Crustacean CHH/MIH/GIH neurohormone family	1e-08
Contig31	gnl|CDD|177157 MTH00094, ND4, NADH dehydrogenase subunit 4	6e-06
Contig32	gnl|CDD|180790 PRK07003, PRK07003, DNA polymerase III subunits gamma and tau	5e-07
Contig34	/	/
Contig35	gnl|CDD|177219 MTH00163, ND4, NADH dehydrogenase subunit 4	1e-12
Contig37	/	/
Contig38	/	/
Contig40	gnl|CDD|117221 pfam08648, DUF1777, Protein of unknown function (DUF1777)	2e-09
Contig41	gnl|CDD|145880 pfam02956, TT_ORF1, TT viral orf 1	7e-14
Contig42	gnl|CDD|147558 pfam05433, Rick_17kDa_Anti, Rickettsia 17 kDa surface antigen	2e-06
Contig43	gnl|CDD|145880 pfam02956, TT_ORF1, TT viral orf 1	2e-13
Contig44	gnl|CDD|165506 PHA03247, PHA03247, large tegument protein UL36	4e-09
Contig46	/	/
Contig47	gnl|CDD|146000 pfam03154, Atrophin-1, Atrophin-1 family	2e-07
Contig48	/	/
Contig49	/	/
F2	gnl|CDD|117221 pfam08648, DUF1777, Protein of unknown function	7e-14
F3	gnl|CDD|162459 TIGR01642, U2AF_lg, U2 snRNP auxilliary factor, large subunit	3e-10
F9	/	/
F16	gnl|CDD|162459 TIGR01642, U2AF_lg, U2 snRNP auxilliary factor, large subunit	2e-11
F21	gnl|CDD|183029 PRK11192, PRK11192, ATP-dependent RNA helicase SrmB	6e-14
F28	gnl|CDD|162459 TIGR01642, U2AF_lg, U2 snRNP auxilliary factor, large subunit	3e-11
F29	/	/
F33	gnl|CDD|177219 MTH00163, ND4, NADH dehydrogenase subunit 4	1e-13
F40	gnl|CDD|146000 pfam03154, Atrophin-1, Atrophin-1 family	7e-06
F51	gnl|CDD|146000 pfam03154, Atrophin-1, Atrophin-1 family	2e-07
F52	gnl|CDD|146000 pfam03154, Atrophin-1, Atrophin-1 family	1e-07
F56	/	/
F60	gnl|CDD|146000 pfam03154, Atrophin-1, Atrophin-1 family	7e-07
F65	gnl|CDD|149563 pfam08555, DUF1754, Eukaryotic family of unknown function	1e-06
F68	/	/
F69	gnl|CDD|146000 pfam03154, Atrophin-1, Atrophin-1 family	1e-07
F85	/	/
F88	/	/
F90	/	/
F91	/	/
F98	gnl|CDD|162459 TIGR01642, U2AF_lg, U2 snRNP auxilliary factor, large subunit	3e-07
F100	/	/
F101		6e-10
F114	/	/
F125	/	/
F131	gnl|CDD|177159 MTH00097, ND6, NADH dehydrogenase subunit 6	3e-06
F132	gnl|CDD|117221 pfam08648, DUF1777, Protein of unknown function	5e-10
F139	/	/
F146	gnl|CDD|162459 TIGR01642, U2AF_lg, U2 snRNP auxilliary factor, large subunit	3e-11
F147	gnl|CDD|146000 pfam03154, Atrophin-1, Atrophin-1 family	5e-07
F153	/	/
F156	/	/
F159	/	/
F169	gnl|CDD|146000 pfam03154, Atrophin-1, Atrophin-1 family	2e-07
F173	/	/
F175	/	/
F180	/	/
F186	/	/
F195	/	/
F226	/	/
F230	/	/
F236	gnl|CDD|162459 TIGR01642, U2AF_lg, U2 snRNP auxilliary factor, large subunit	1e-11
F238	/	/
F242	/	/
F243	/	/
F260	/	/
F262	gnl|CDD|146000 pfam03154, Atrophin-1, Atrophin-1 family	1e-06
F270	/	/
F284	gnl|CDD|146000 pfam03154, Atrophin-1, Atrophin-1 family	4e-08
F285	/	/
F290	/	/
F301	/	/
F312	gnl|CDD|177220 MTH00165, ND5, NADH dehydrogenase subunit 5	4e-06
F317	gnl|CDD|146000 pfam03154, Atrophin-1, Atrophin-1 family	3e-08
F318	gnl|CDD|149331 pfam08208, RNA_polI_A34, DNA-directed RNA polymerase I subunit	3e-09
F319	gnl|CDD|117221 pfam08648, DUF1777, Protein of unknown function	1e-10
F322	gnl|CDD|162459 TIGR01642, U2AF_lg, U2 snRNP auxilliary factor, large subunit	5e-06
F325	/	/
F328	gnl|CDD|146000 pfam03154, Atrophin-1, Atrophin-1 family	7e-08
F333	gnl|CDD|162459 TIGR01642, U2AF_lg, U2 snRNP auxilliary factor, large subunit	5e-11
F337	gnl|CDD|183029 PRK11192, PRK11192, ATP-dependent RNA helicase SrmB	1e-06
F338	gnl|CDD|117221 pfam08648, DUF1777, Protein of unknown function	3e-17
F341	/	/
F343	gnl|CDD|146000 pfam03154, Atrophin-1, Atrophin-1 family	7e-07
F345	gnl|CDD|117221 pfam08648, DUF1777, Protein of unknown function	9e-16
F348	/	/
F350	gnl|CDD|117221 pfam08648, DUF1777, Protein of unknown function	1e-06
F365	/	/
F383	gnl|CDD|146000 pfam03154, Atrophin-1, Atrophin-1 family	4e-06
F385	/	/
F387	gnl|CDD|146000 pfam03154, Atrophin-1, Atrophin-1 family	1e-06
F391	gnl|CDD|146000 pfam03154, Atrophin-1, Atrophin-1 family	4e-07
F395	/	/
F398	/	/
F405	/	/
F408	/	/
F416	/	/
F421	gnl|CDD|117221 pfam08648, DUF1777, Protein of unknown function	1e-14
F429	gnl|CDD|162459 TIGR01642, U2AF_lg, U2 snRNP auxilliary factor, large subunit	5e-12
